# Supplementary material for: High Frequency of CD8 Positive Lymphocyte Infiltration Correlates with Lack of Lymph Node Involvement in Early Rectal Cancer
Source: Hindawi journal article supplement (doi:10.1155/2014/792183), 2014-01-01
Supplement: f1 [file 792183.f1.pdf]

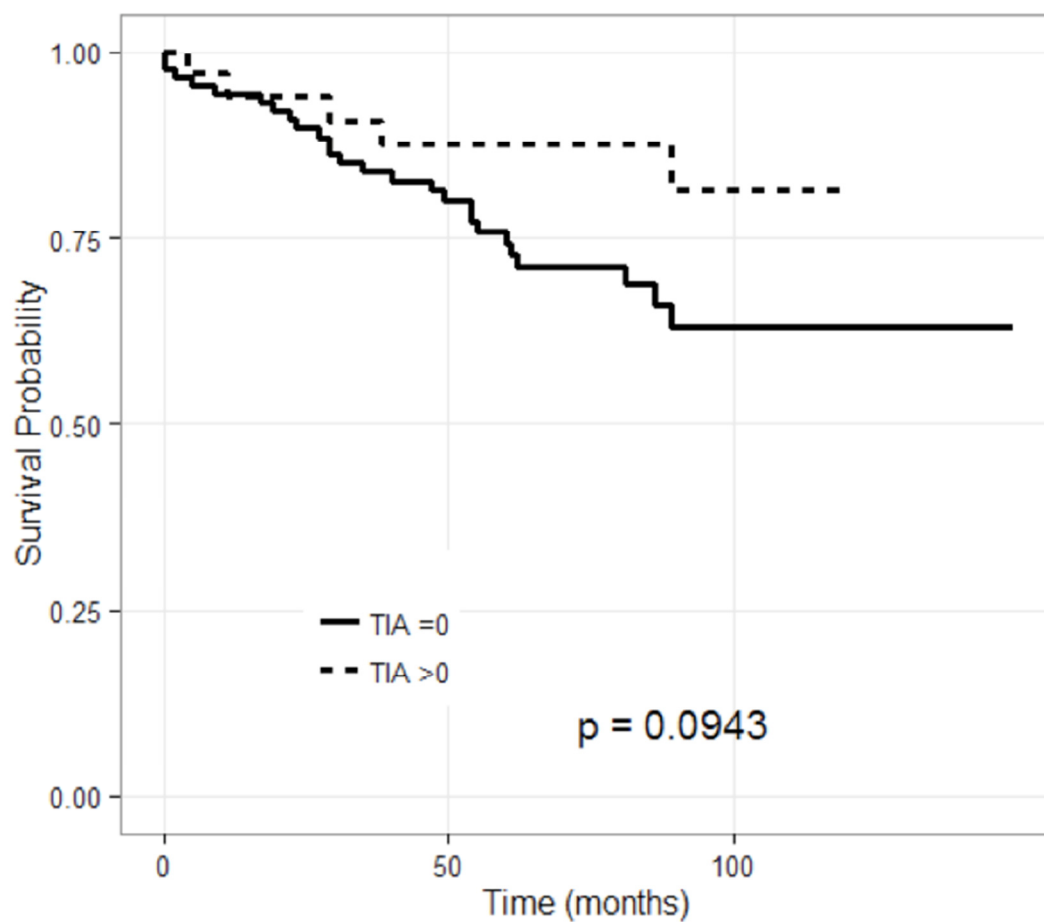

|         |    |    |    |
|---------|----|----|----|
| TIA = 0 | 94 | 58 | 16 |
| TIA > 0 | 34 | 24 | 8  |

Numbers at risk

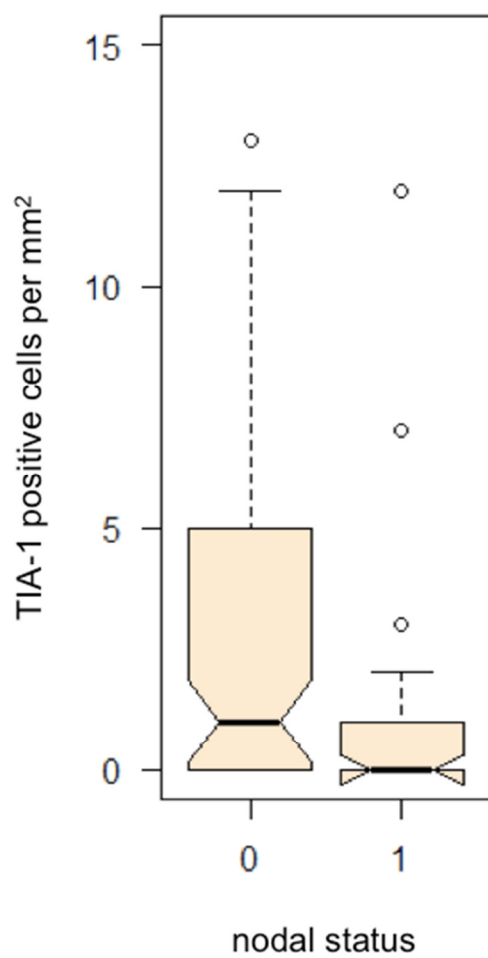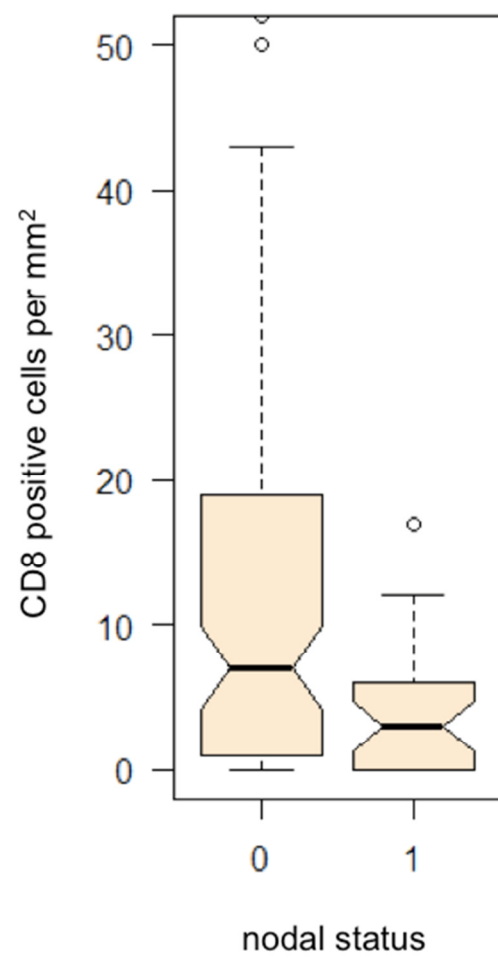

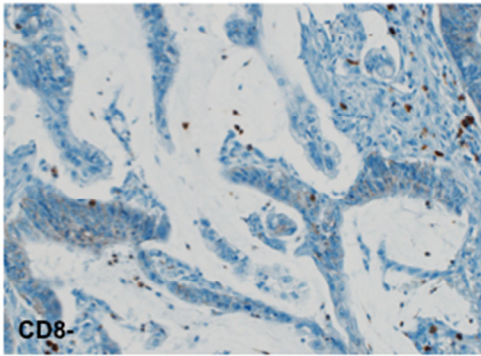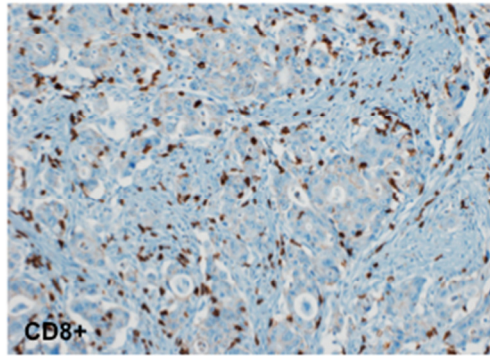

Examples of IHC-staining for CD8: CD8-, less than 10 CD8+ lymphocytes.  
CD8+: more than 10 CD8+ lymphocytes.

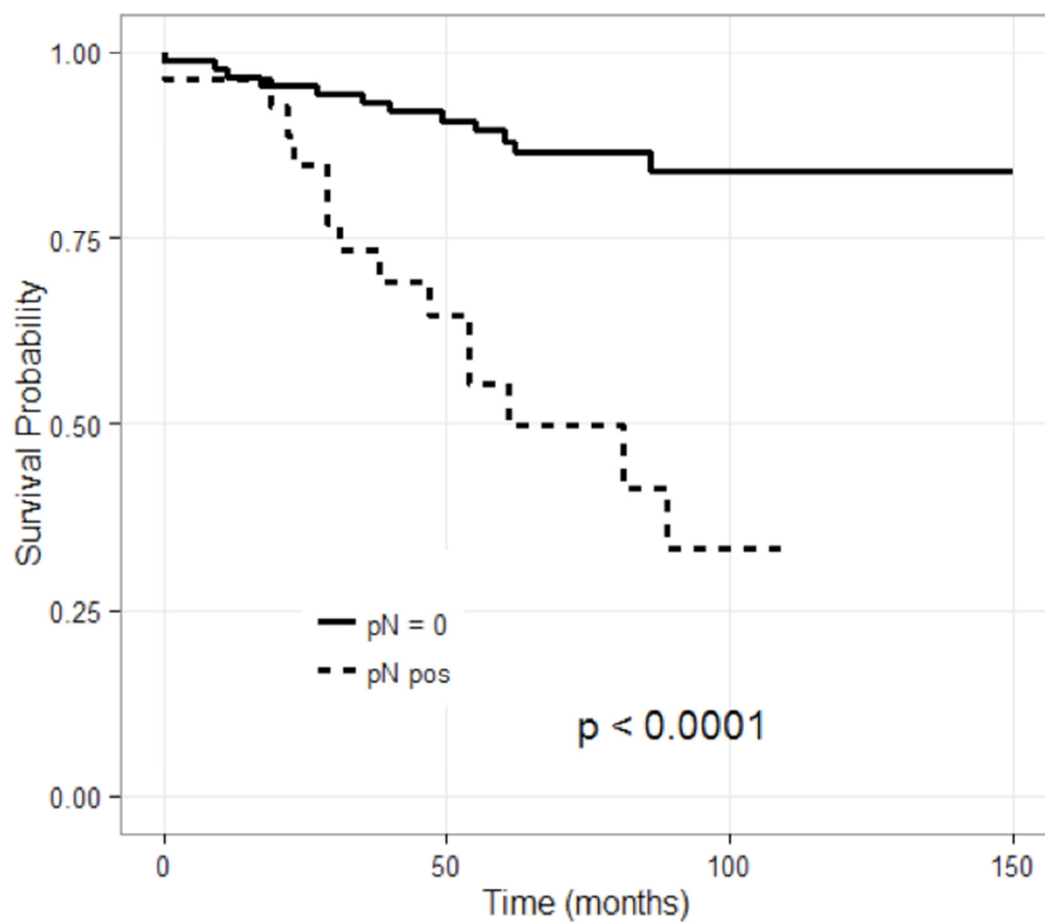

|        | 0  | 50 | 100 | 150 |
|--------|----|----|-----|-----|
| pN = 0 | 95 | 69 | 20  | 1   |
| pN pos | 28 | 14 | 3   | 0   |

Numbers at risk

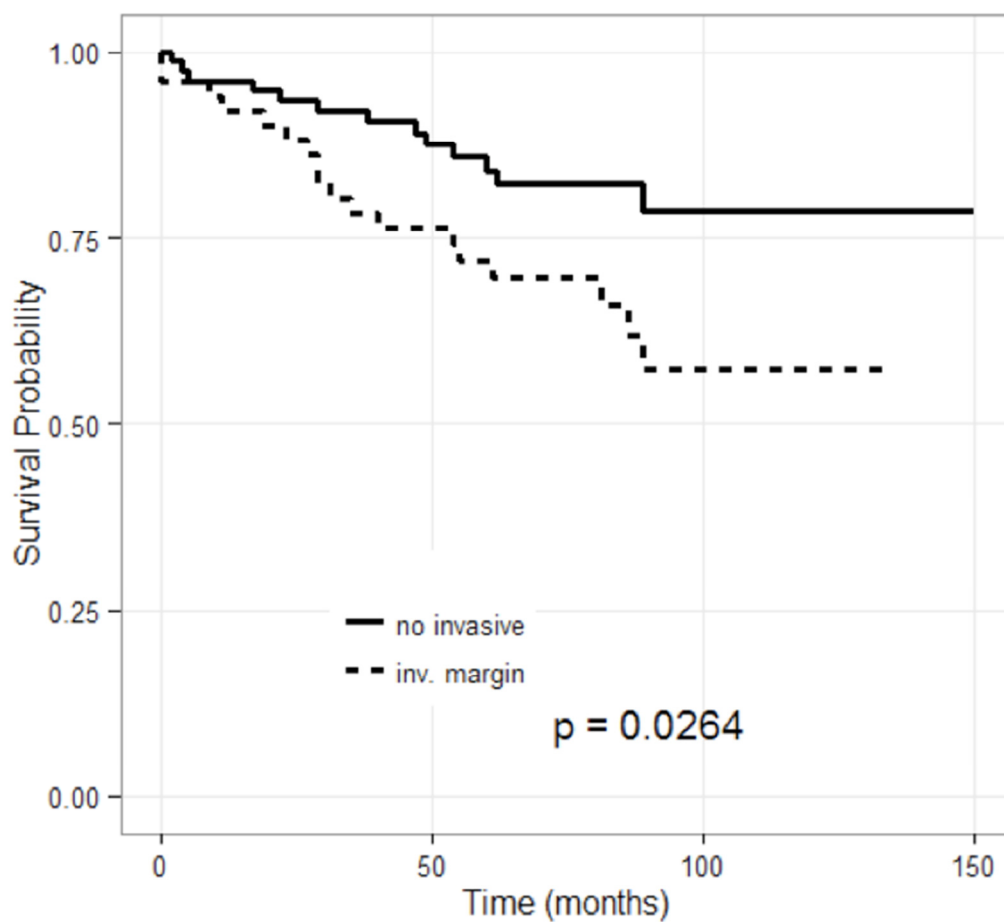

|             |    |    |    |   |
|-------------|----|----|----|---|
| no invasive | 84 | 55 | 16 | 1 |
| inv. margin | 52 | 34 | 10 | 0 |

Numbers at risk

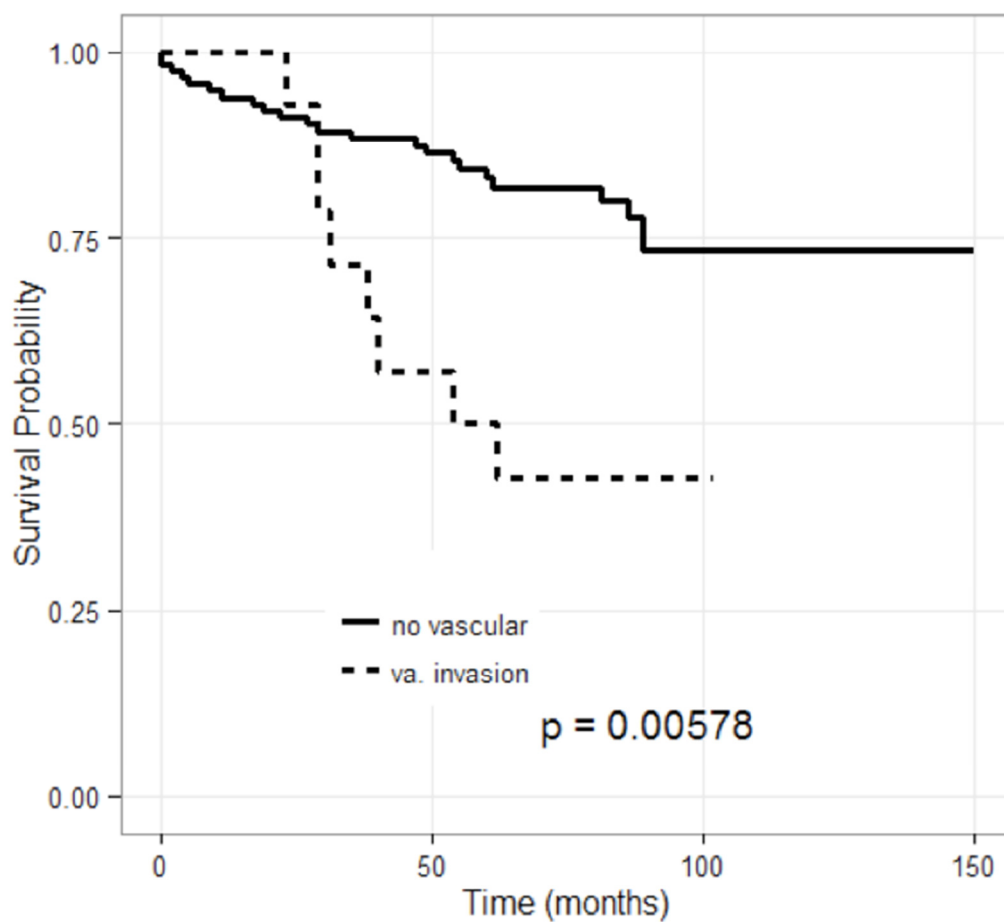

|              |     |                 |    |   |
|--------------|-----|-----------------|----|---|
| no vascular  | 120 | 81              | 23 | 1 |
| va. invasion | 16  | 8               | 3  | 0 |
|              |     | Numbers at risk |    |   |
